# Supplementary material
Source: Springer Nature journal article supplement (https://www.springermedizin.de/resource/supplementary/13041_2010_91_MOESM7_ESM.pdf/25657500)

Sympathetic Ganglia, DRG

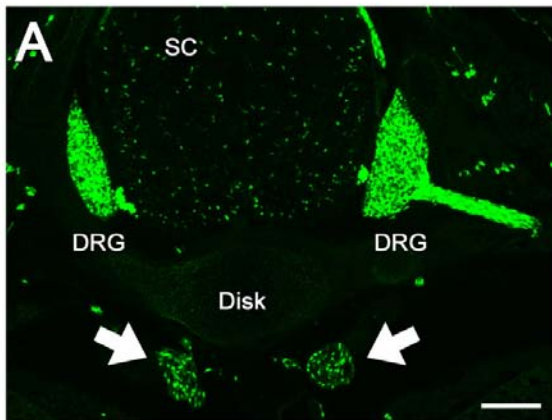

Trigeminal Ganglia, Eye

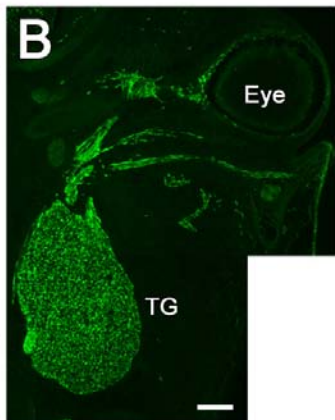

Adrenal Gland

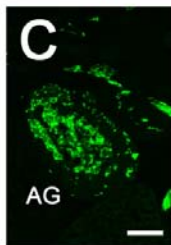

Esophagus

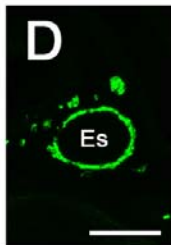

Stomach, Hindgut, Midgut

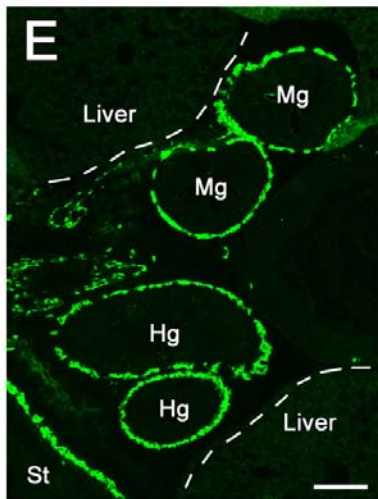

Otic vesicle

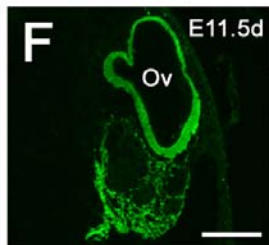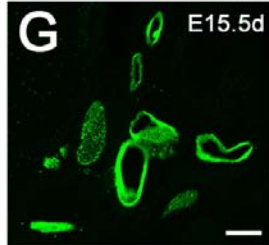

Supplement: MOESM7 [file 25657500]
